# Supplementary material
Source: HighWire-hosted journal article supplement (https://gh.bmj.com/content/4/4/e001659)

# Logic Models

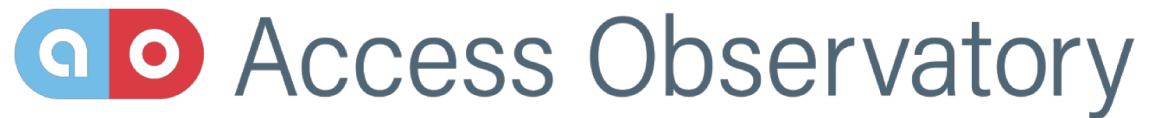

\*Developed by the Access Observatory team at the Boston University School of Public Health. Members of Access Accelerated companies provided input and feedback during the development process.

# Community Strategies

## 1. Community Awareness and Linkage to Care

Strategy: Community Awareness and Linkage to Care

Definition: Programs that provide communities and patients with health-related information on disease prevention and treatment, or improve links between patients and the health care system.

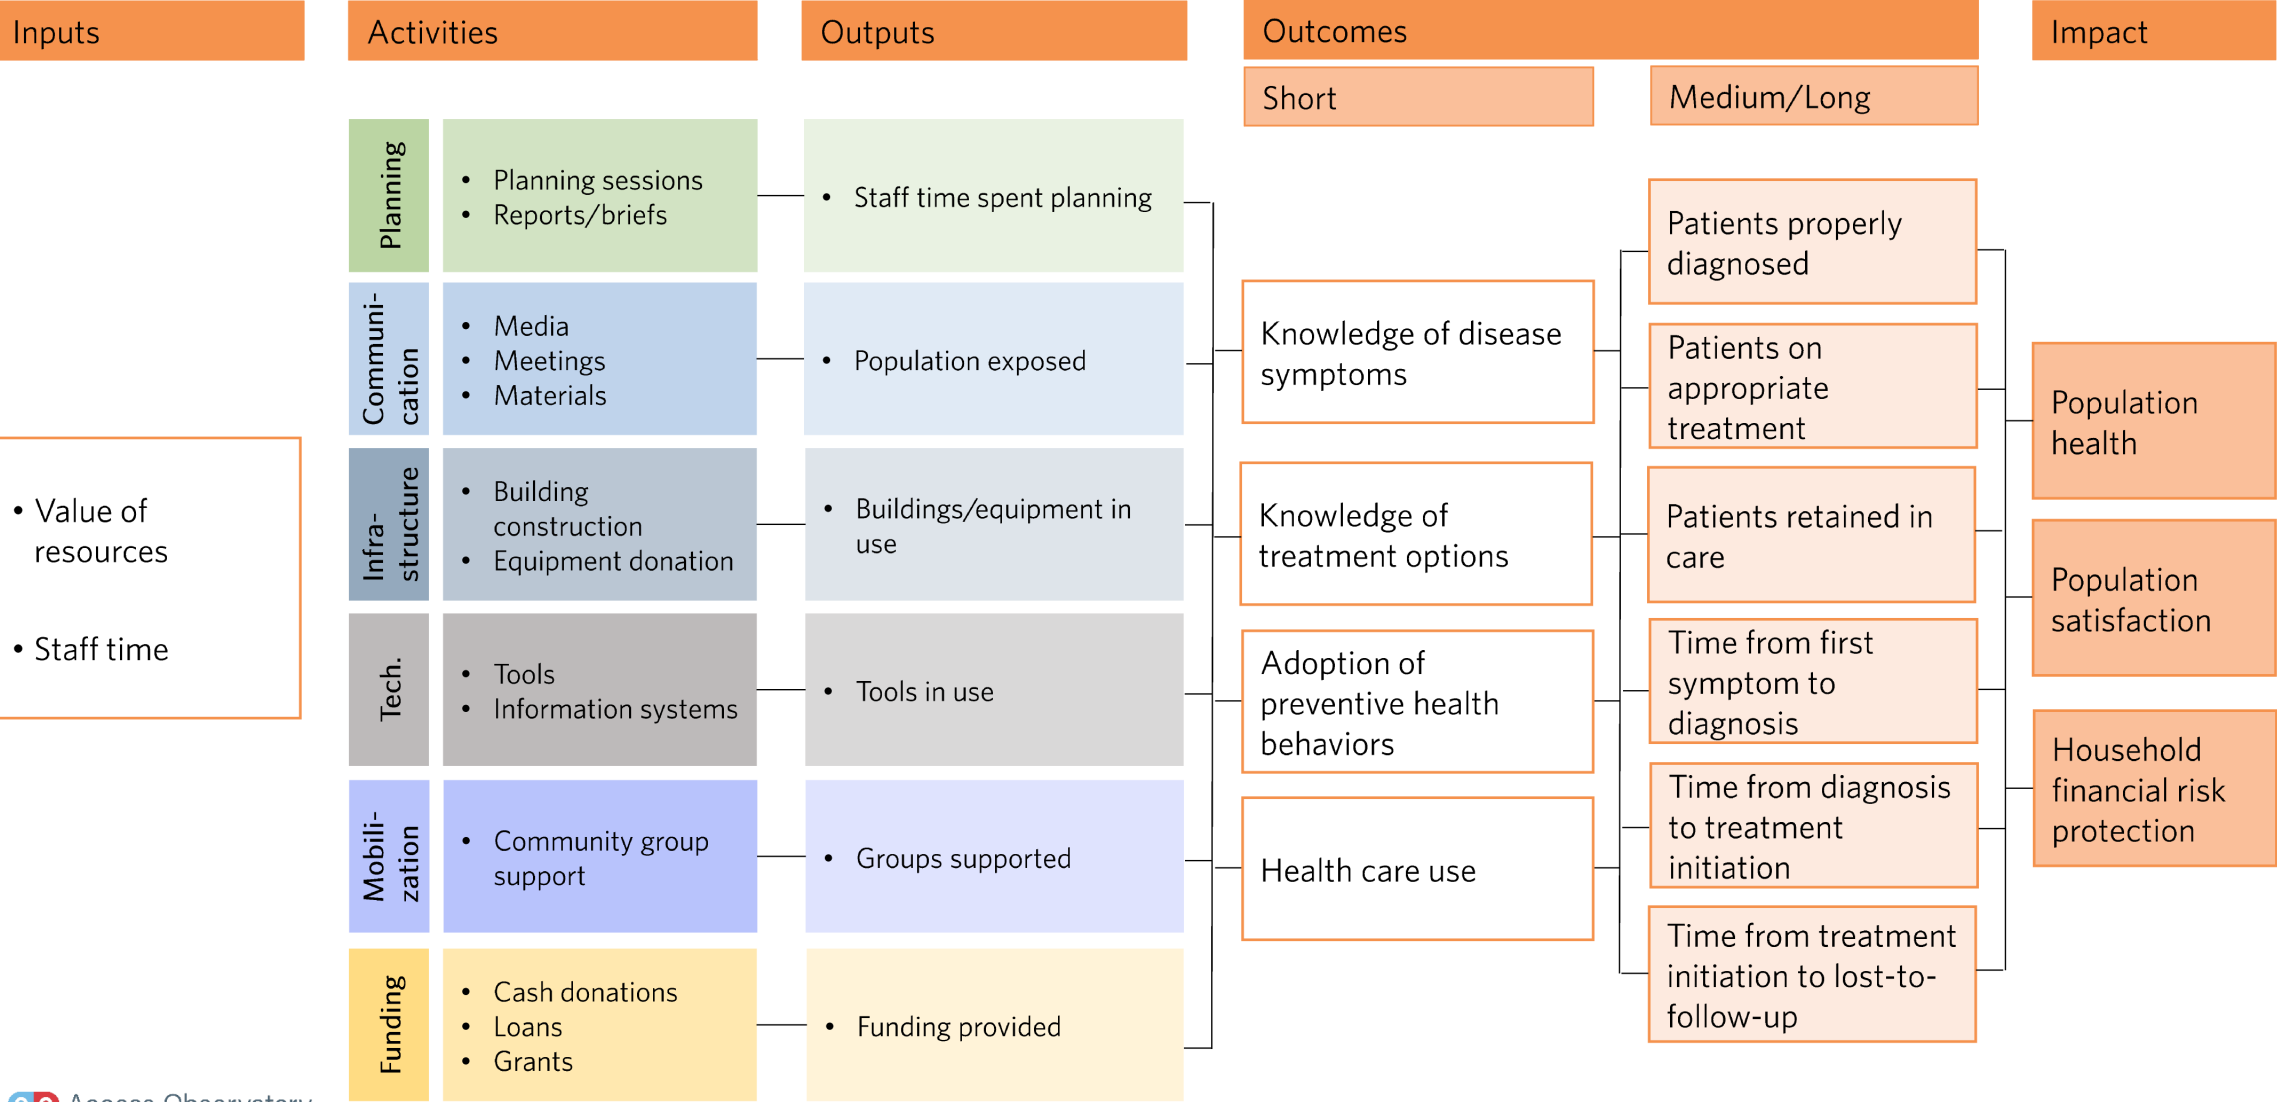

# System Strategies

1. Health Service Strengthening
2. Health Service Delivery
3. Supply Chain
4. Financing
5. Regulation and Legislation

Strategy: Health Service Strengthening

Definition: Programs designed to improve the availability, affordability, and quality of health services.

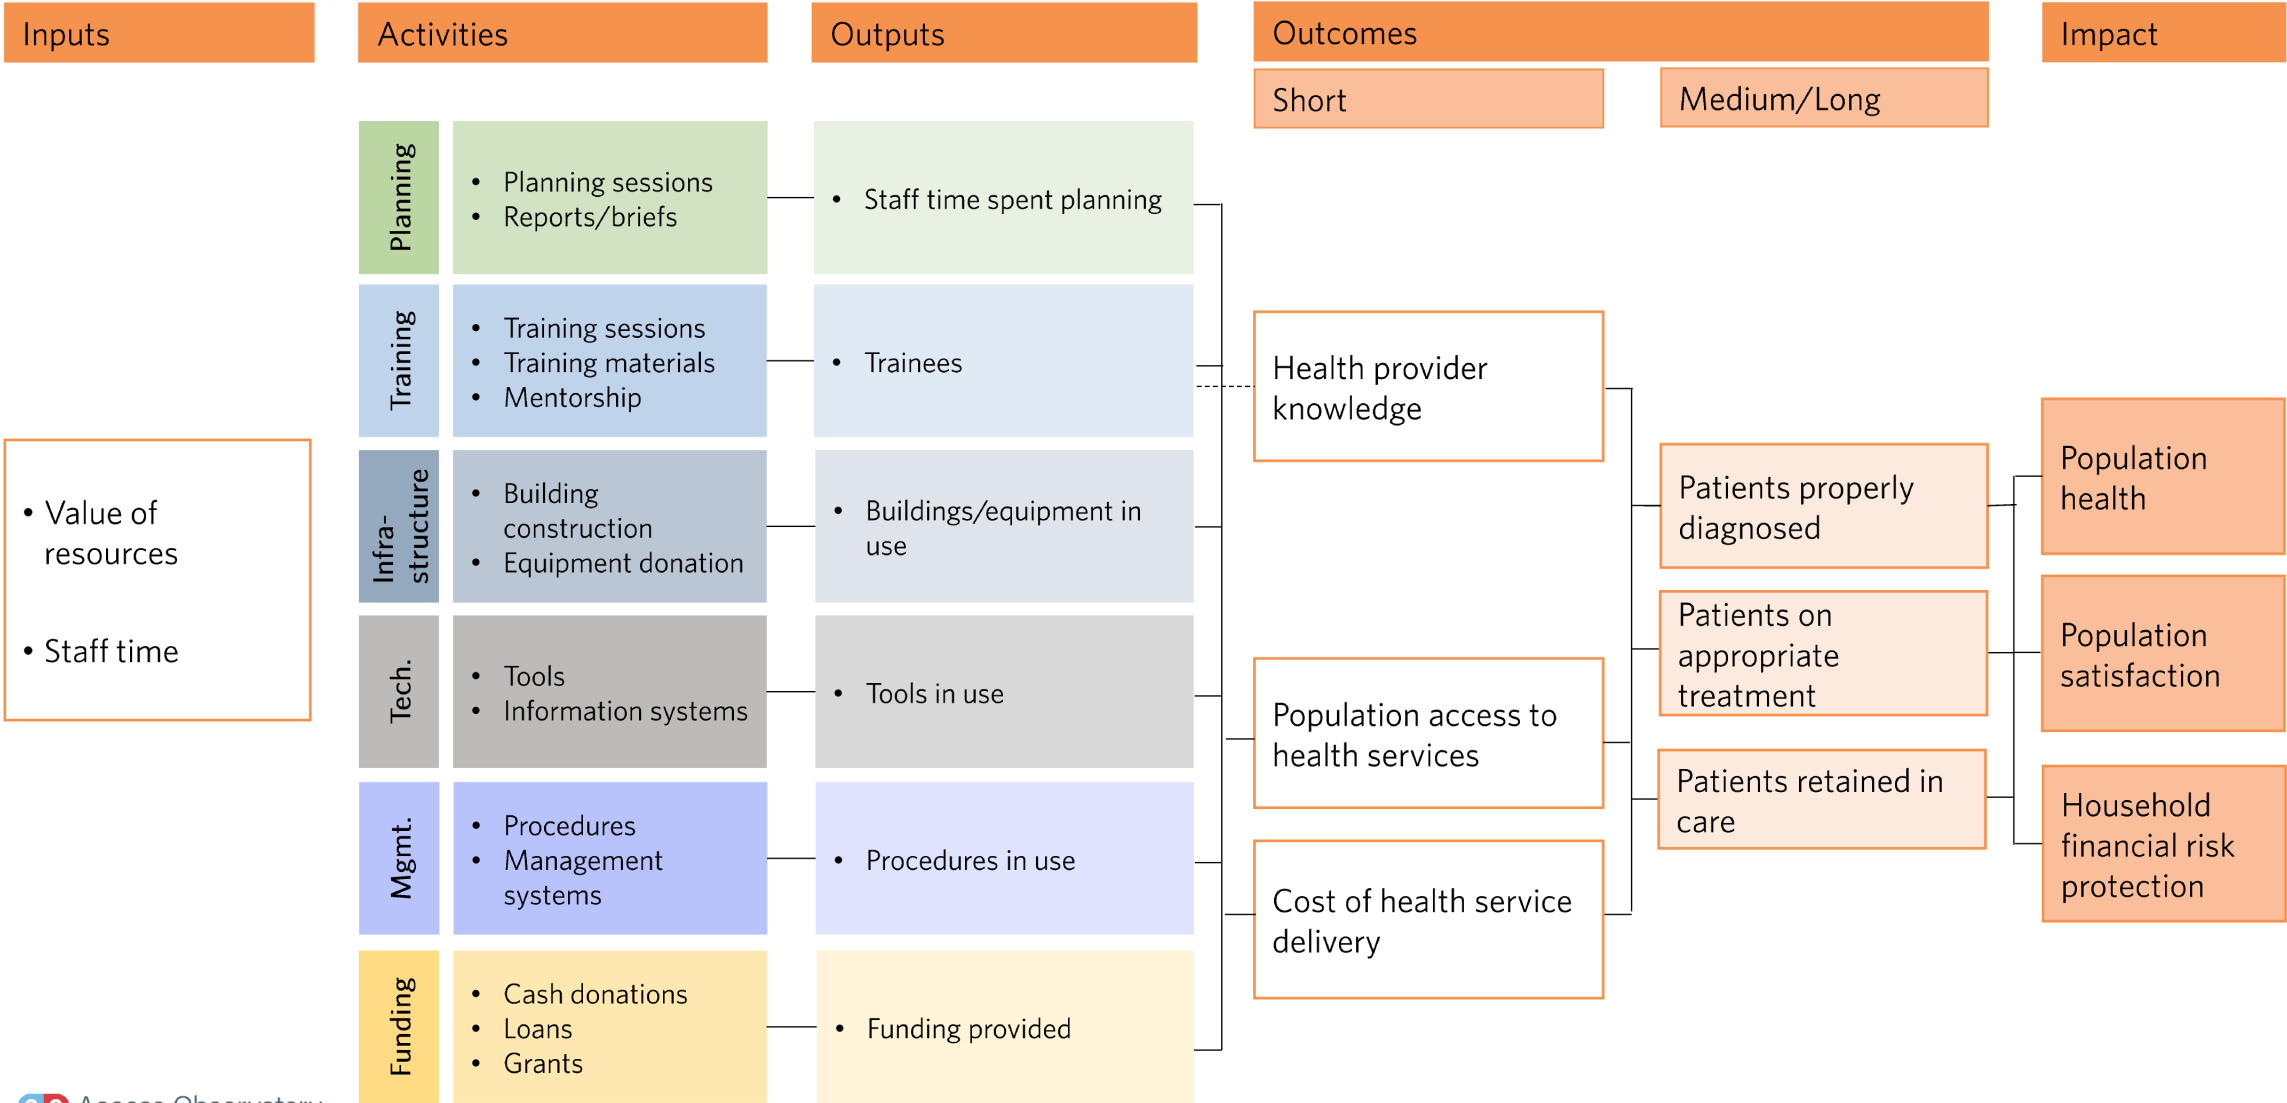

Strategy: Health Service Delivery

Definition: Programs designed to deliver health services directly to patients.

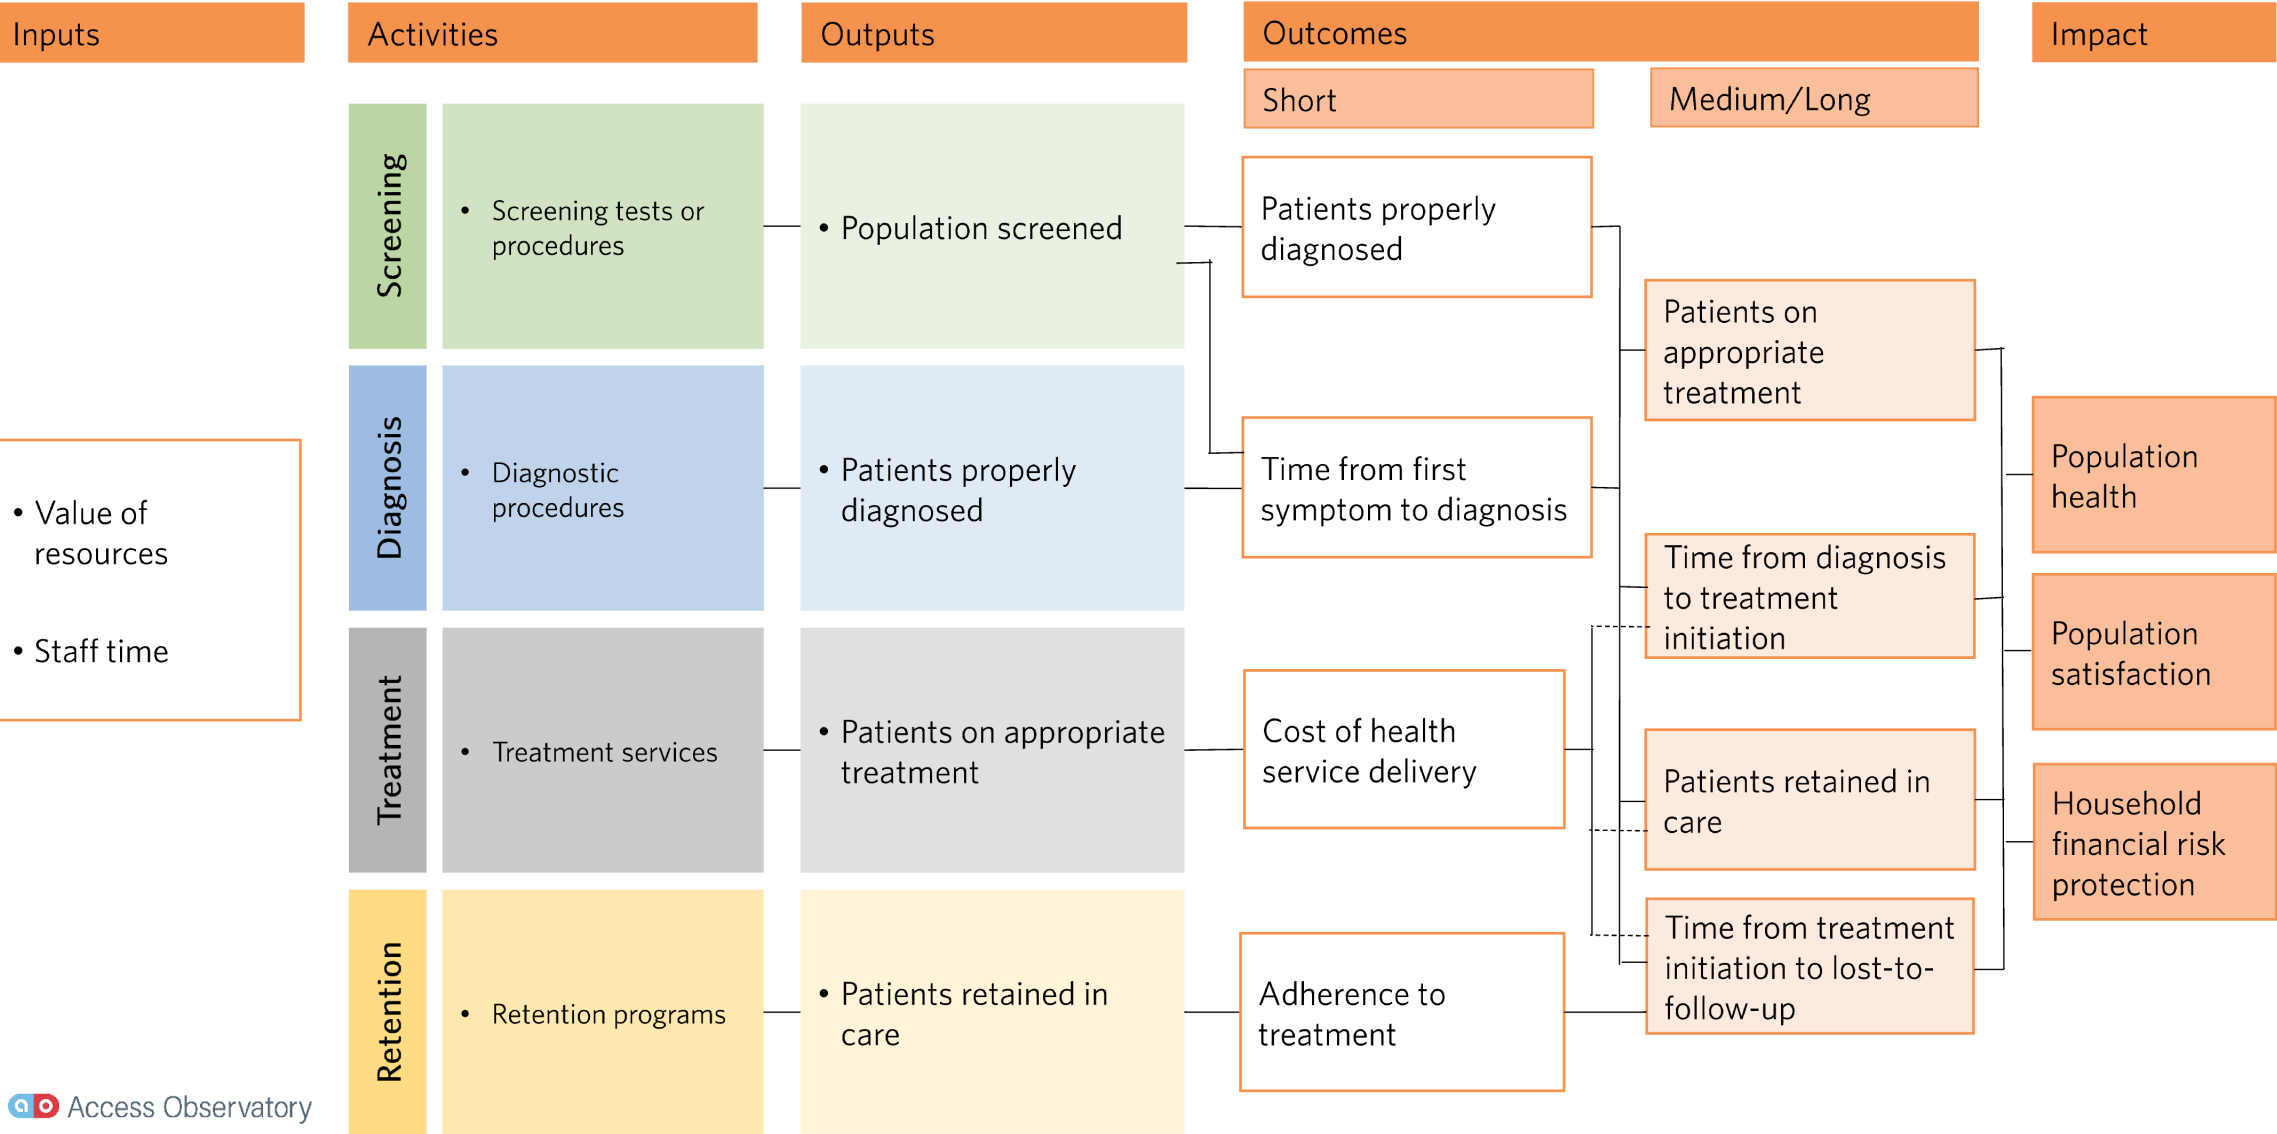

Strategy: Supply Chain

Definition: Programs designed to improve medicine supply chains, to improve availability and lower costs.

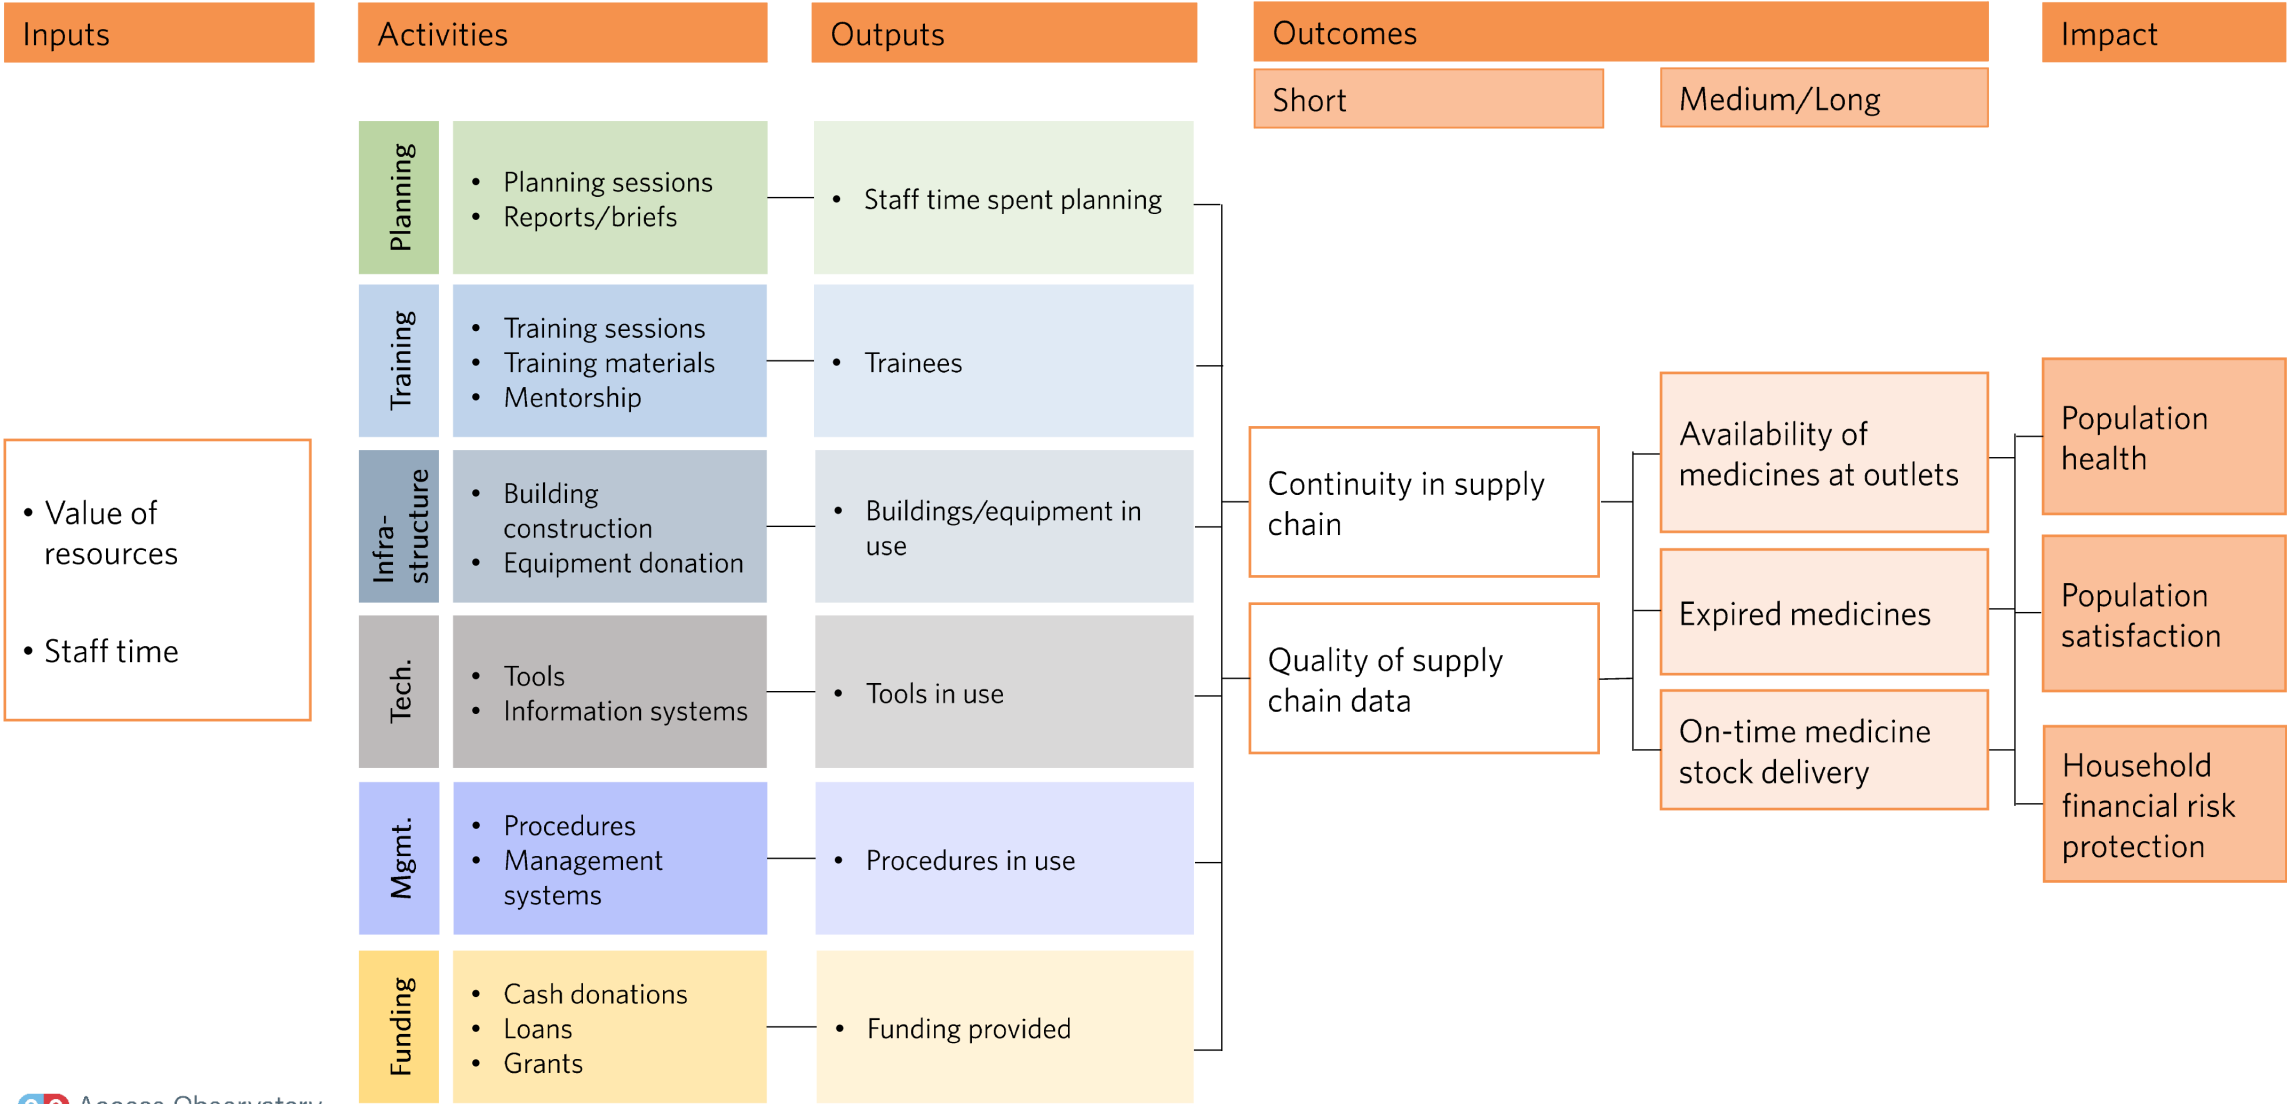

Strategy: Financing

Definition: Programs designed to improve health financing systems and reduce catastrophic health expenditure.

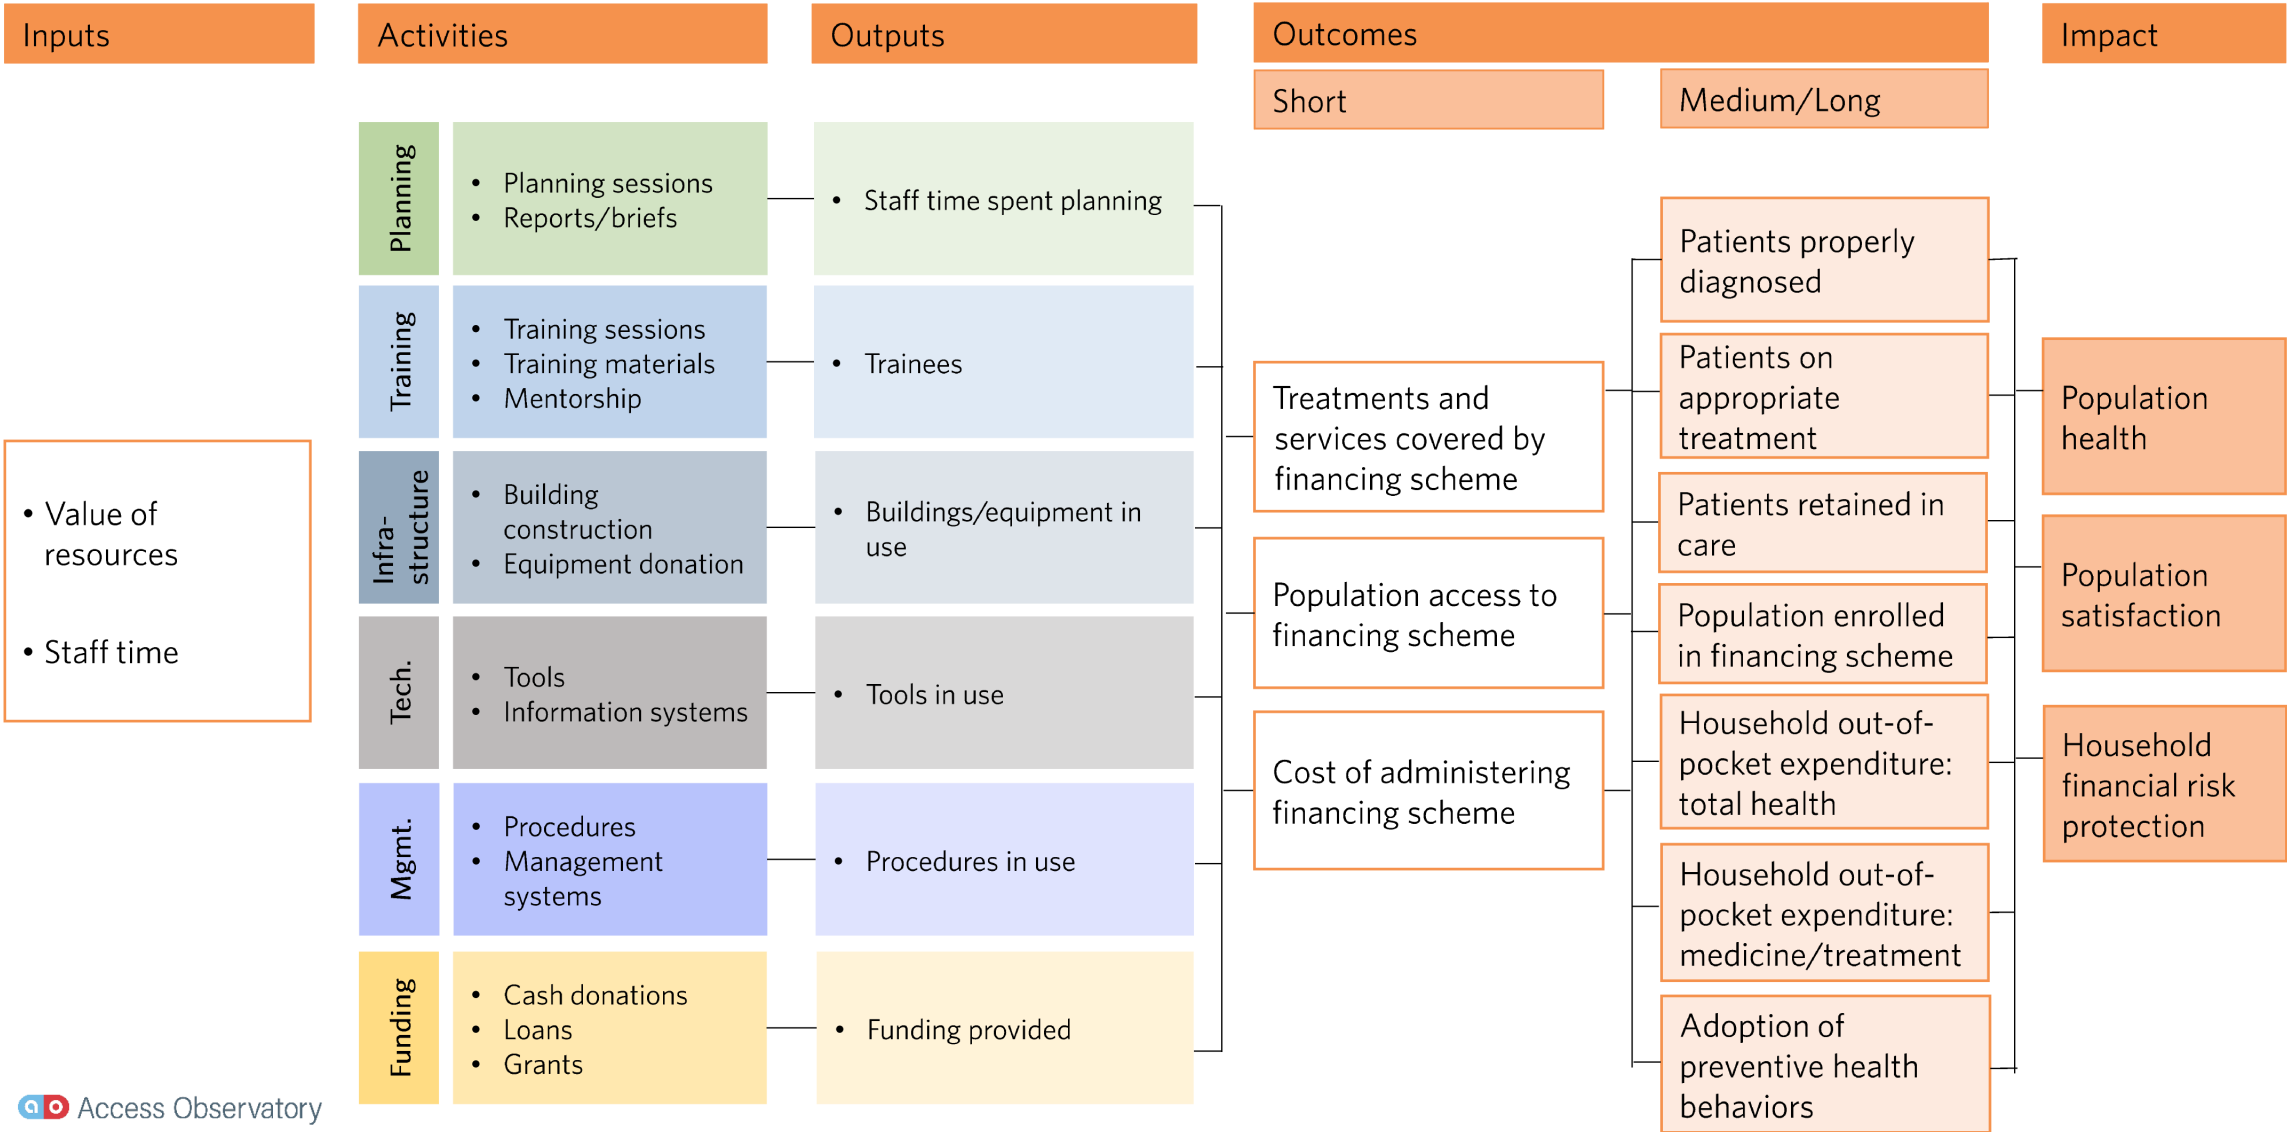



**Strategy:** Regulation and Legislation

**Definition:** Programs designed to improve and harmonize pharmaceutical regulatory systems, improve government coverage of and access to treatments, and/or improve in-country regulatory processes.

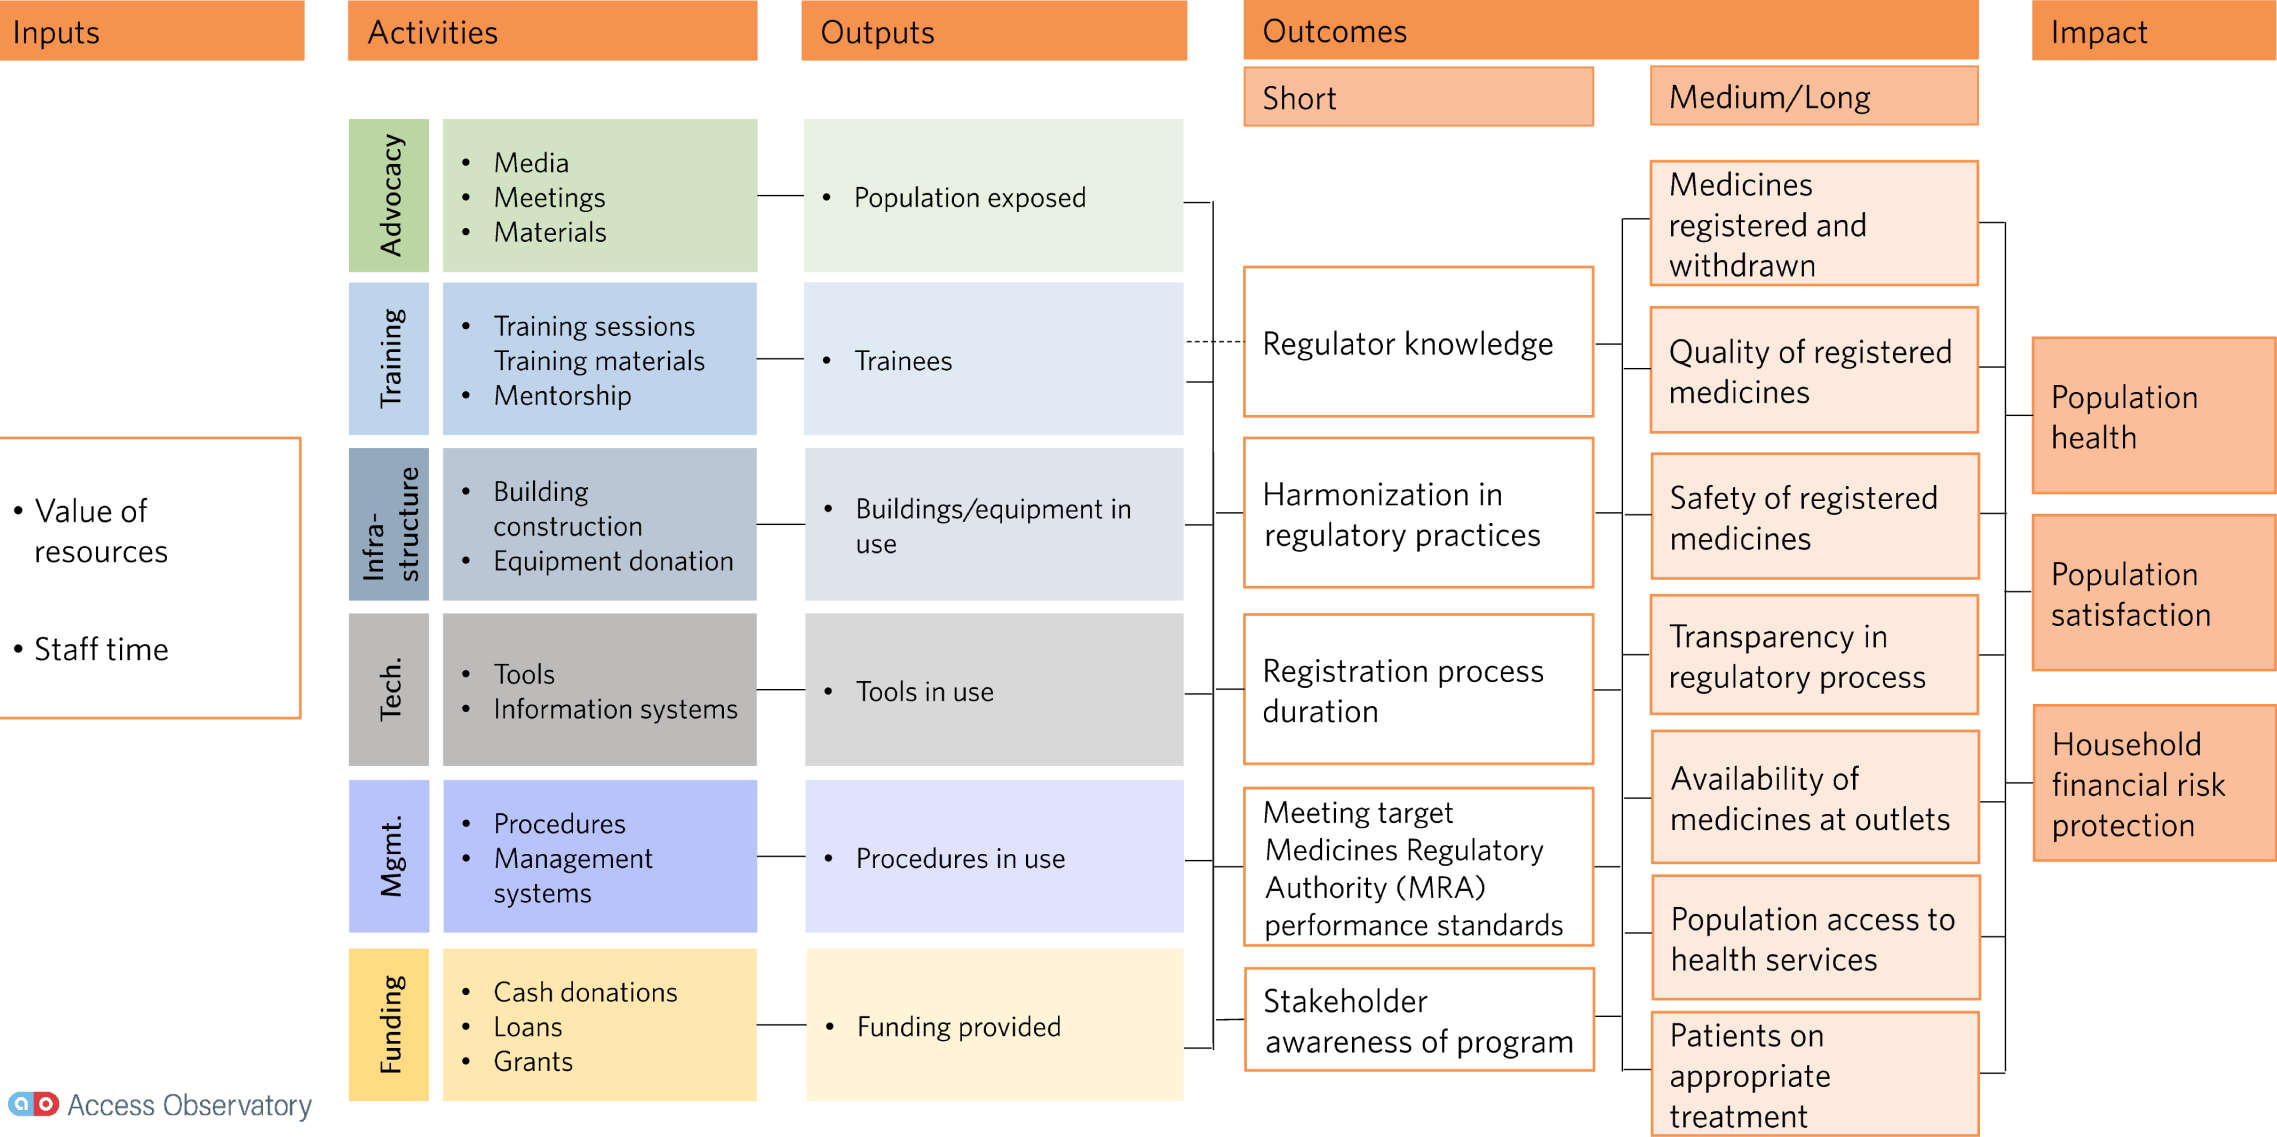

# Production Strategies

1. Manufacturing
2. Product Development Research
3. Licensing Agreement

**Strategy:** Manufacturing  
**Definition:** Programs designed to build capacity for medicine production.

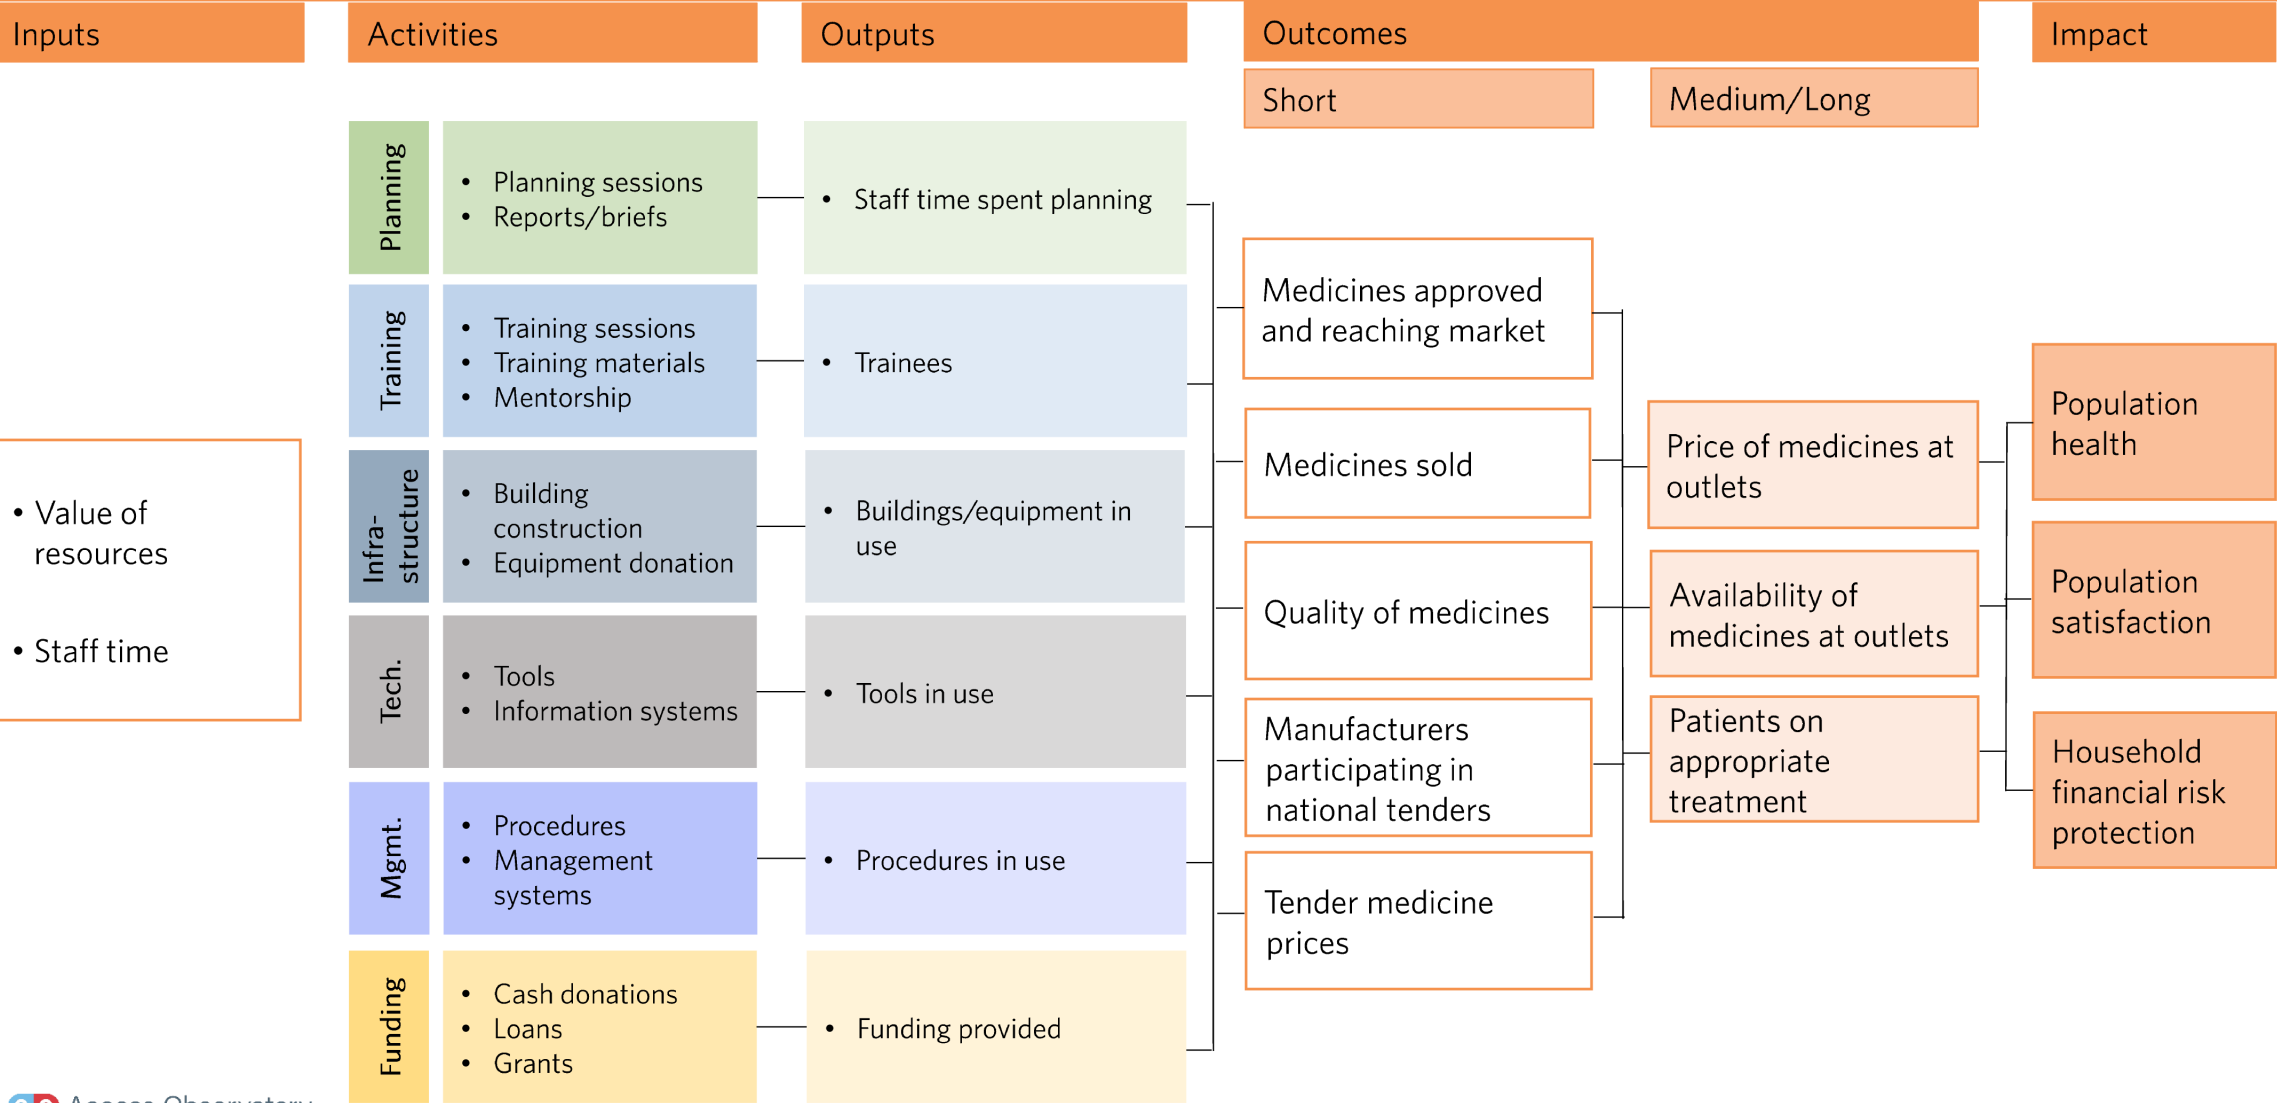

Strategy: Product Development Research

Definition: Programs designed to support product (e.g. drugs, devices, etc.) development research. Relevant research areas include bench science, pre-clinical and clinical trials, and post-marketing monitoring.

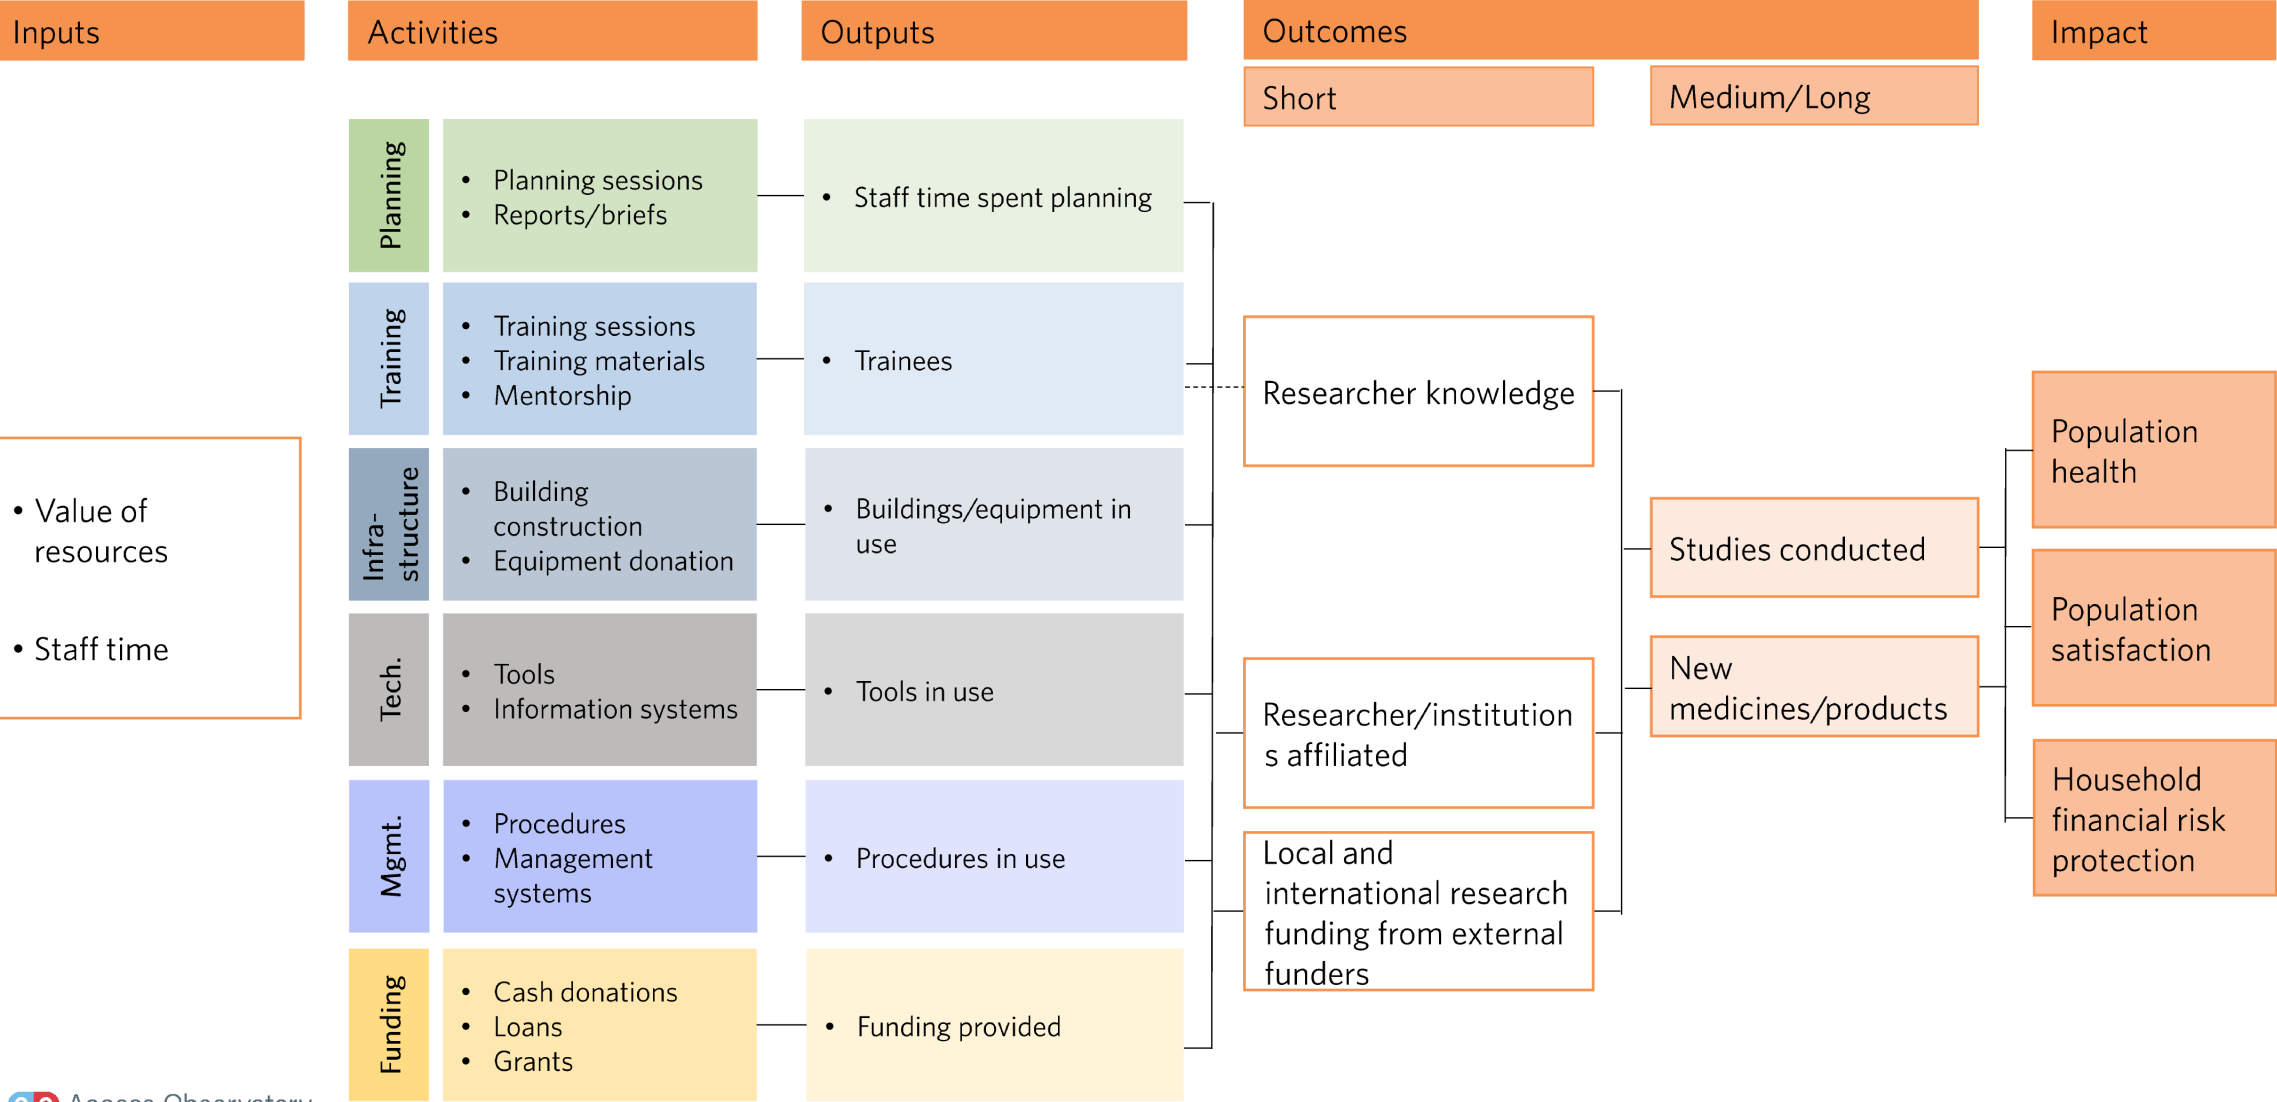

Strategy: Licensing Agreement

Definition: Programs designed to support local manufacture, importation, sale or use of medicines through legally binding relationships including voluntary agreements and technology sharing.

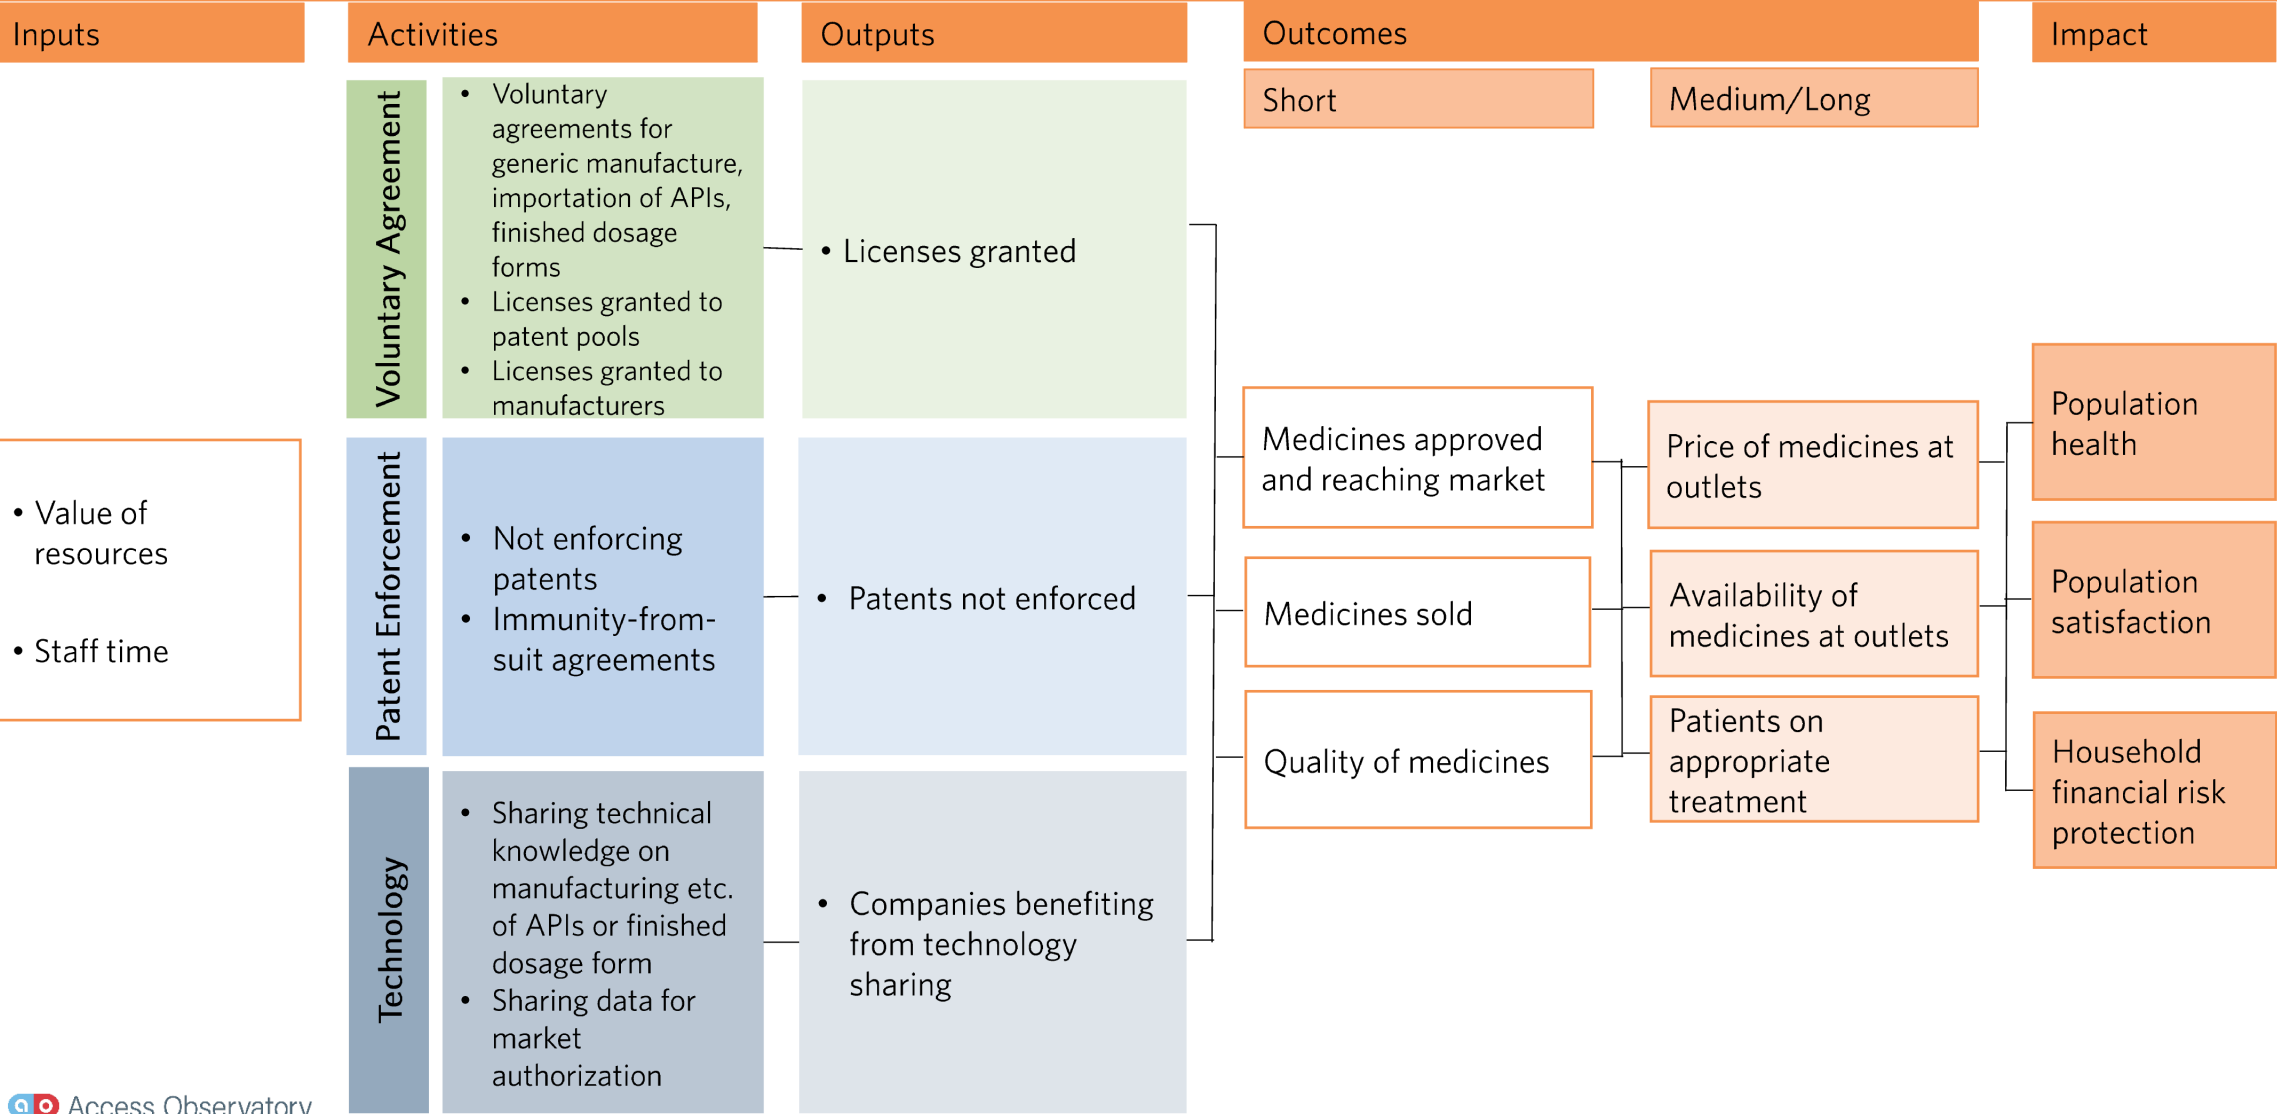

# Price Strategies

1. Price Scheme
2. Medicine Donation

Strategy: Price Scheme

Definition: Programs designed to increase the affordability of medicines for individuals and healthcare systems through a reduction in the price via subsidies or other means (excluding donations).

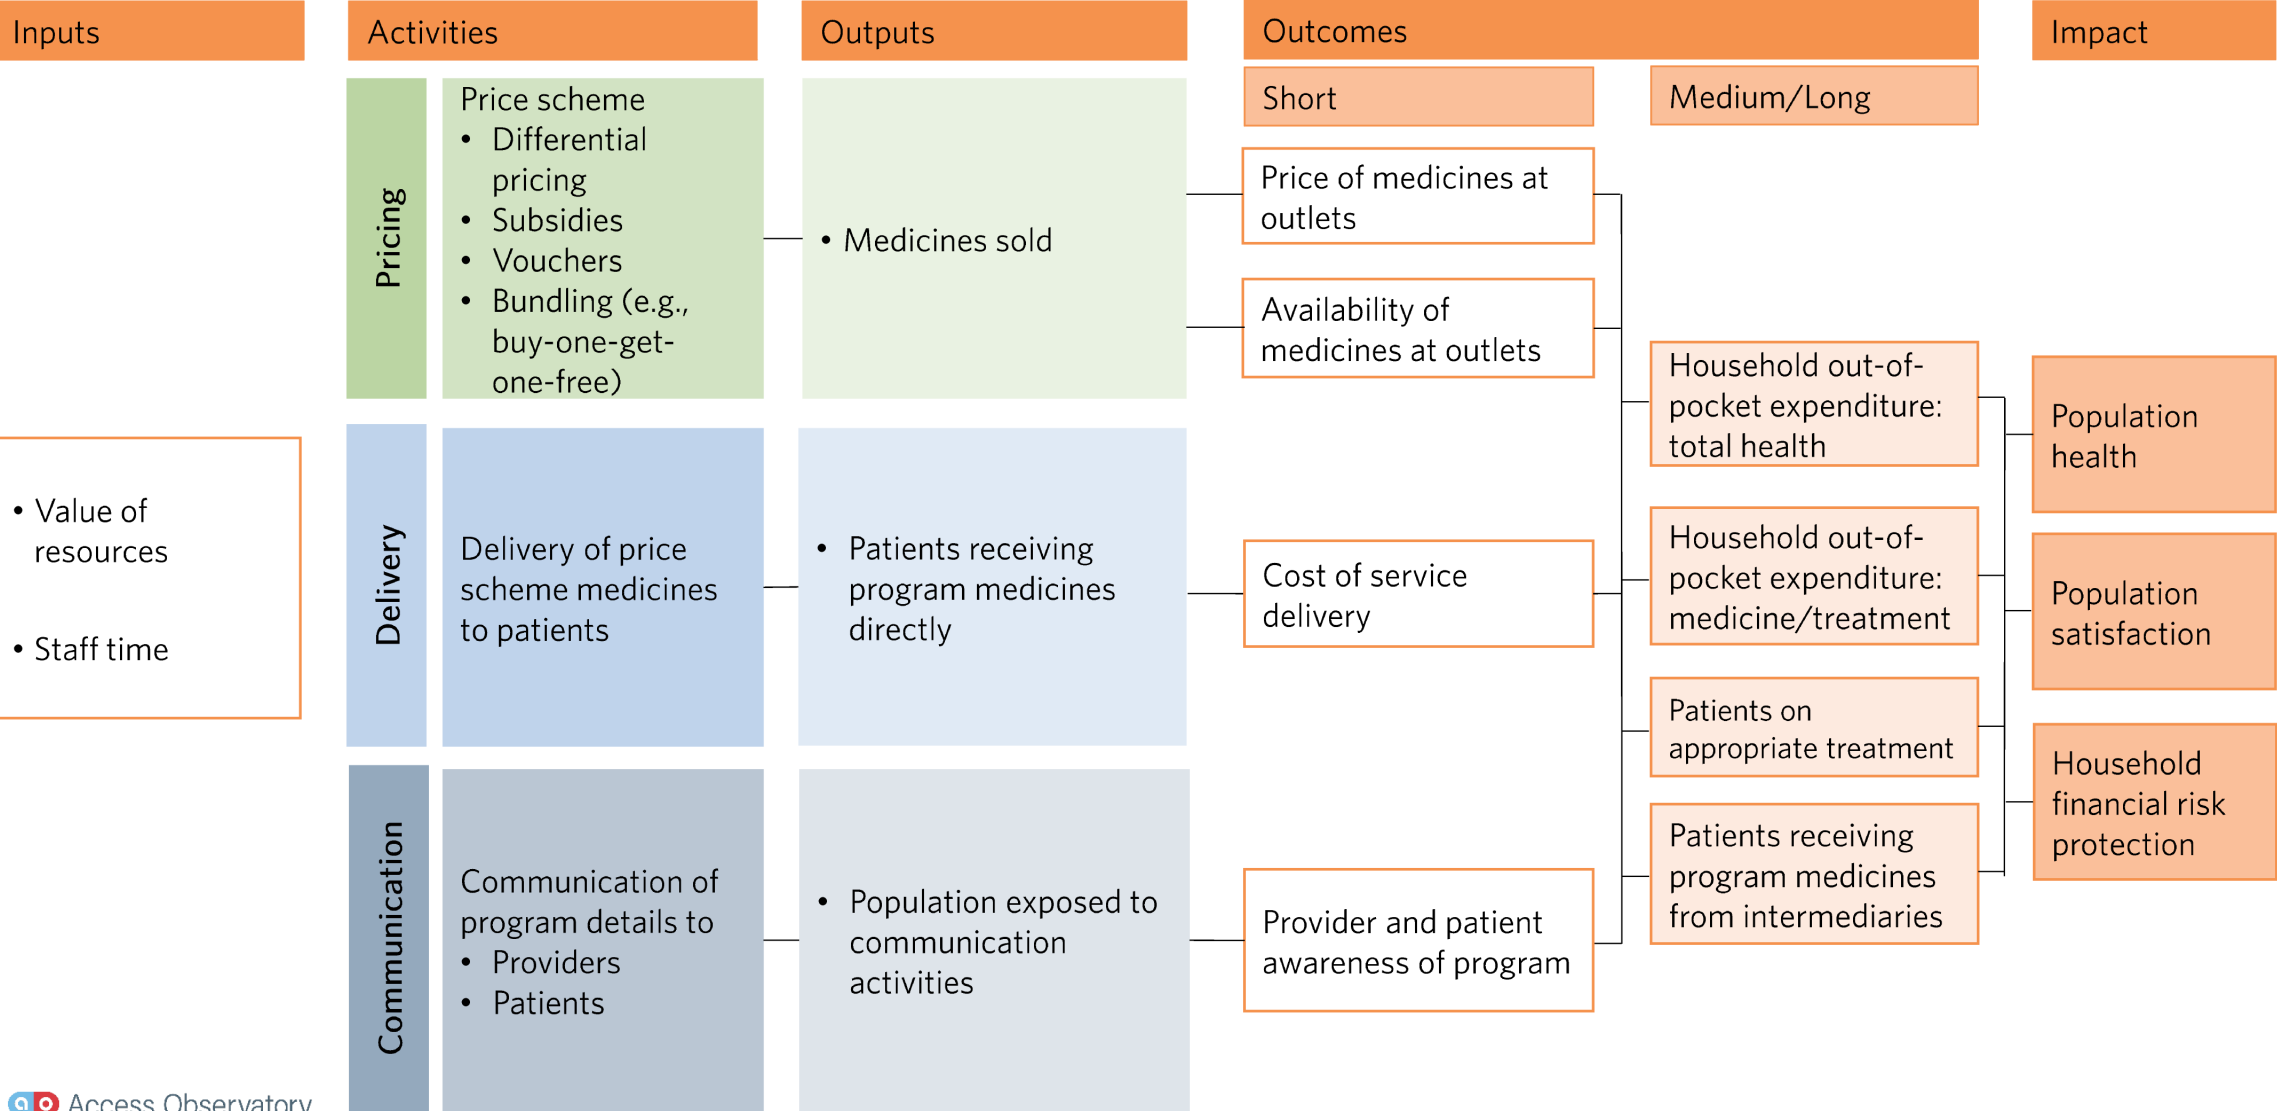

**Strategy:** Medicine Donation

**Definition:** Programs designed to increase the availability and/or affordability of medicines through direct donation of medicines, and other healthcare products, to countries or health institutions or non-governmental organizations. Does not include compassionate access programs.

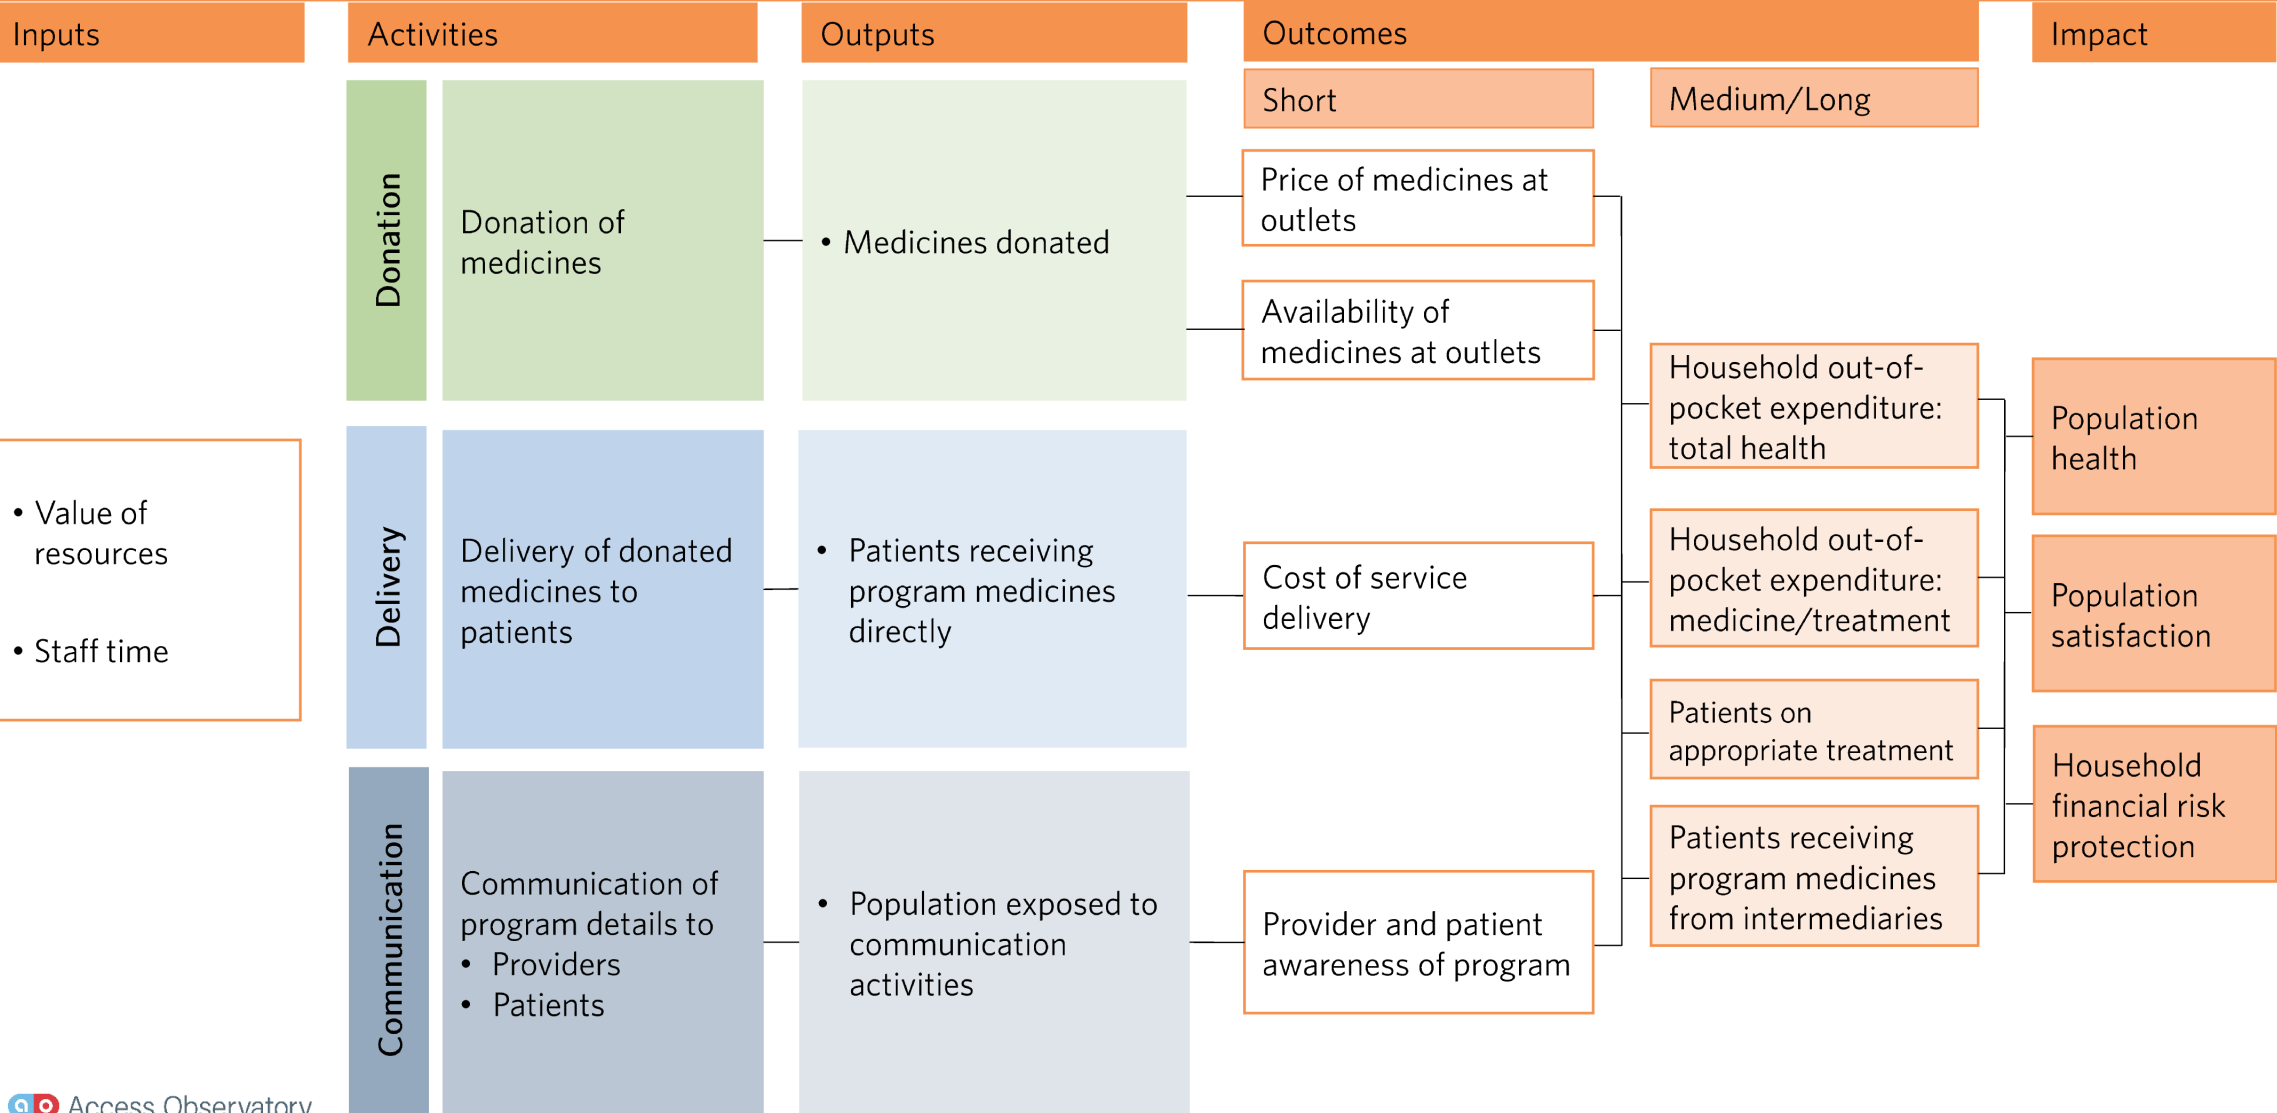

Supplement: inline-supplementary-material-2 [file inline-supplementary-material-2.pdf]
